# Supplementary material for: Controlled preparation of Au/Ag/SnO2 core–shell nanoparticles using a photochemical method and applications in LSPR based sensing
Source: Royal Society of Chemistry journal article supplement (doi:10.1039/c5nr01579k), 2015-01-01
Supplement: c5nr01579k1.pdf [file c5nr01579k1.pdf]

## Electronic Supplementary Information

### Controlled Preparation of Au/Ag/SnO<sub>2</sub> Core-Shell Nanoparticles Using a Photochemical Method and Applications in LSPR based Sensing

Na Zhou,<sup>a,b</sup> Chen Ye,<sup>a</sup> Lakshminarayana Polavarapu<sup>a</sup> and Qing-Hua Xu<sup>\*a,b</sup>

<sup>a</sup> Department of Chemistry, National University of Singapore, Singapore 117543

E-mail: [chmxqh@nus.edu.sg](mailto:chmxqh@nus.edu.sg).

<sup>b</sup> National University of Singapore (Suzhou) Research Institute (NUSRI), Suzhou, Jiangsu, China 215123

### Experimental Section

#### Chemicals and Materials

Hexadecyltrimethylammoniumbromide (CTAB) (98%), sodium borohydride (99%), gold(III) chloride trihydrate (HAuCl<sub>4</sub>•3H<sub>2</sub>O) (99.9%) and sodium stannate trihydrate (Na<sub>2</sub>SnO<sub>3</sub>•3H<sub>2</sub>O)(95%) were purchased from Sigma-Aldrich. Silver nitrate (AgNO<sub>3</sub>) and L-(+)-ascorbic acid were purchased from Alfa Aesar. De-ionized water was used in all the experiments.

#### Synthesis of Gold nanorods (Au NRs):

Au NRs were prepared by using a previously reported seed-mediated growth method.<sup>1</sup> The seed solution was first prepared by adding 250 μL of 0.01 M HAuCl<sub>4</sub> to 10 mL of 0.1 M CTAB solution in a plastic tube. 0.6 mL of freshly prepared ice-cold 0.01 M NaBH<sub>4</sub> solution was quickly added and mixed by gentle shaking for 2 min. The resultant brownish yellow solution was kept at room temperature for at least 2 h before used as the seed solution. In the seed-mediated growth step, 2.0 mL of 0.01M HAuCl<sub>4</sub> and 0.27 mL of 0.01 M AgNO<sub>3</sub> were added into 40 mL of 0.1 M CTAB solution and mixed by gentle shaking. 0.8 mL of 1.0 M HCl, 0.32 mL of 0.1 M freshly prepared L-(+)-ascorbic acid solution, and 96 μL of seed solution were then added into the mixture sequentially. The reaction mixture was left undisturbed at least 6 h for longitudinal overgrowth. Finally, CTAB capped Au NRs with longitudinal plasmon resonance band at 763 nm were obtained.

### Preparation of Gold nanospheres (AuNSs):

20 nm CTAC capped AuNSs were prepared according to a previously reported three-step procedure.<sup>2</sup> Citrate-stabilized Au seeds with diameter of 3.5 nm were first prepared by the following steps. The mixture of sodium citrate (250  $\mu$ L, 0.01 M) and HAuCl<sub>4</sub> (50  $\mu$ L, 0.05M) was diluted with 9.4 mL of H<sub>2</sub>O in a round bottom flask, followed by injection of ice-cold NaBH<sub>4</sub> (300  $\mu$ L, 0.1 M) and mixed by vigorously stirring for 2 min. The obtained solution was kept in room temperature for at least 3 h before use. Au NSs with a diameter of 8 nm was subsequently prepared. HAuCl<sub>4</sub> (45  $\mu$ L, 0.05 M) and freshly prepared L- (+) -ascorbic acid (50  $\mu$ L, 0.1M) were added into CTAC solution (9 mL, 0.08 M). After mixing, 1 mL of previously obtained Au seed (3.5 nm) was injected. The mixed solution was stirred for 10 min to grow AuNSs with a diameter of 8 nm. At last, the resultant 8 nm AuNSs were used as seeds for the growth of CTAC capped Au NSs. HAuCl<sub>4</sub> (225  $\mu$ L, 0.05 M) and L- (+) -ascorbic acid (250  $\mu$ L, 0.1M) were added into 45 mL of CTAC (0.08 M) and mixed by gently shaking. 5 mL of 8 nm Au NSs solution was then added into the mixture under vigorously stirring, which was continued for 10 min. The mixture solution was kept at room temperature for 3 h before use. Finally, Au NSs with averaged diameters of 20 nm were obtained.

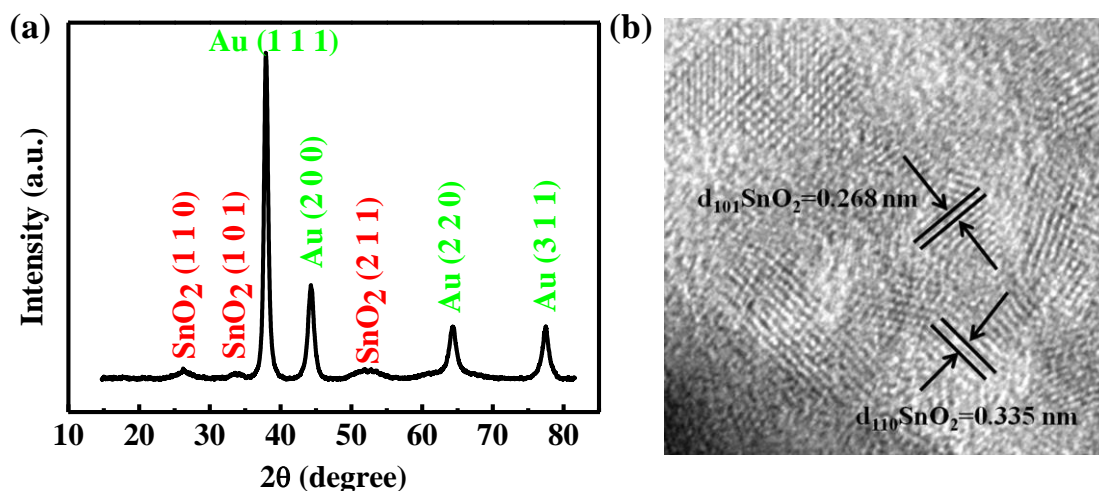

**Figure S1** (a) XRD pattern of AuNR/SnO<sub>2</sub>. (b) HRTEM image of AuNR/SnO<sub>2</sub>, which was focused on the SnO<sub>2</sub> shell.

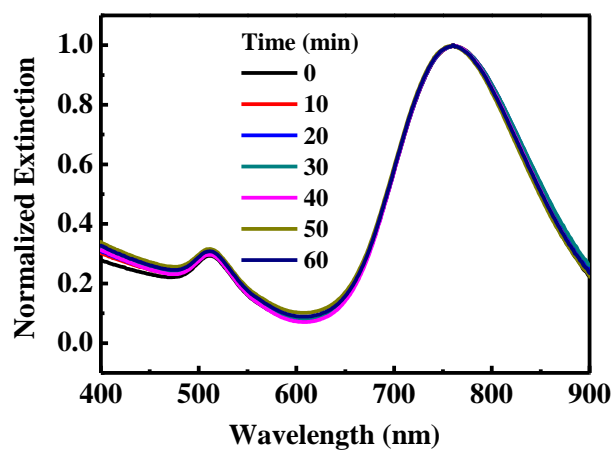

**Figure S2** UV-Vis extinction spectra of Au NR reacted with AgNO<sub>3</sub> under UV light irradiation.

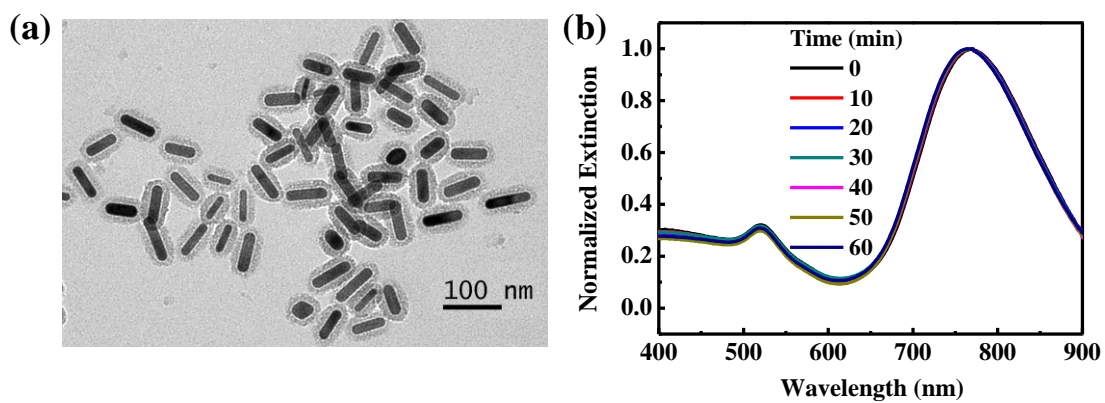

**Figure S3** (a) TEM image of AuNR/SiO<sub>2</sub>; (b) UV-vis extinction spectra of the AuNR/SiO<sub>2</sub> and AgNO<sub>3</sub> mixture solution under irradiation by UV light.

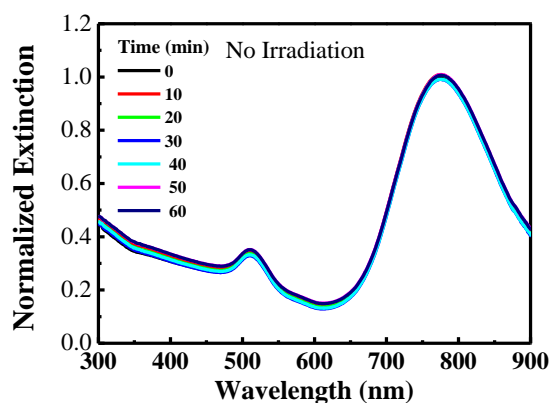

**Figure S4** UV-vis extinction spectra of the AuNR/SnO<sub>2</sub> and AgNO<sub>3</sub> mixture solution without any light irradiation.

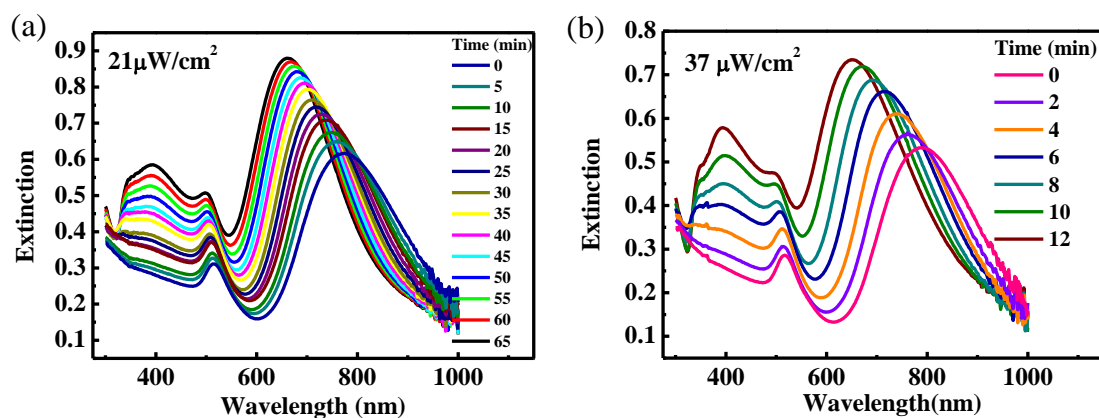

**Figure S5** UV-vis extinction spectra of the mixture of Au/SnO<sub>2</sub> and AgNO<sub>3</sub> irradiation with UV light at intensity of 21 μW/cm<sup>2</sup> and 37 μW/cm<sup>2</sup>

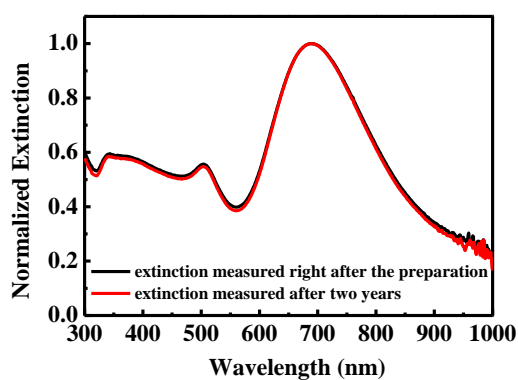

**Figure S6** Extinction spectra of one Au/AgNR/SnO<sub>2</sub> sample measured right after preparation and after storage for two years.

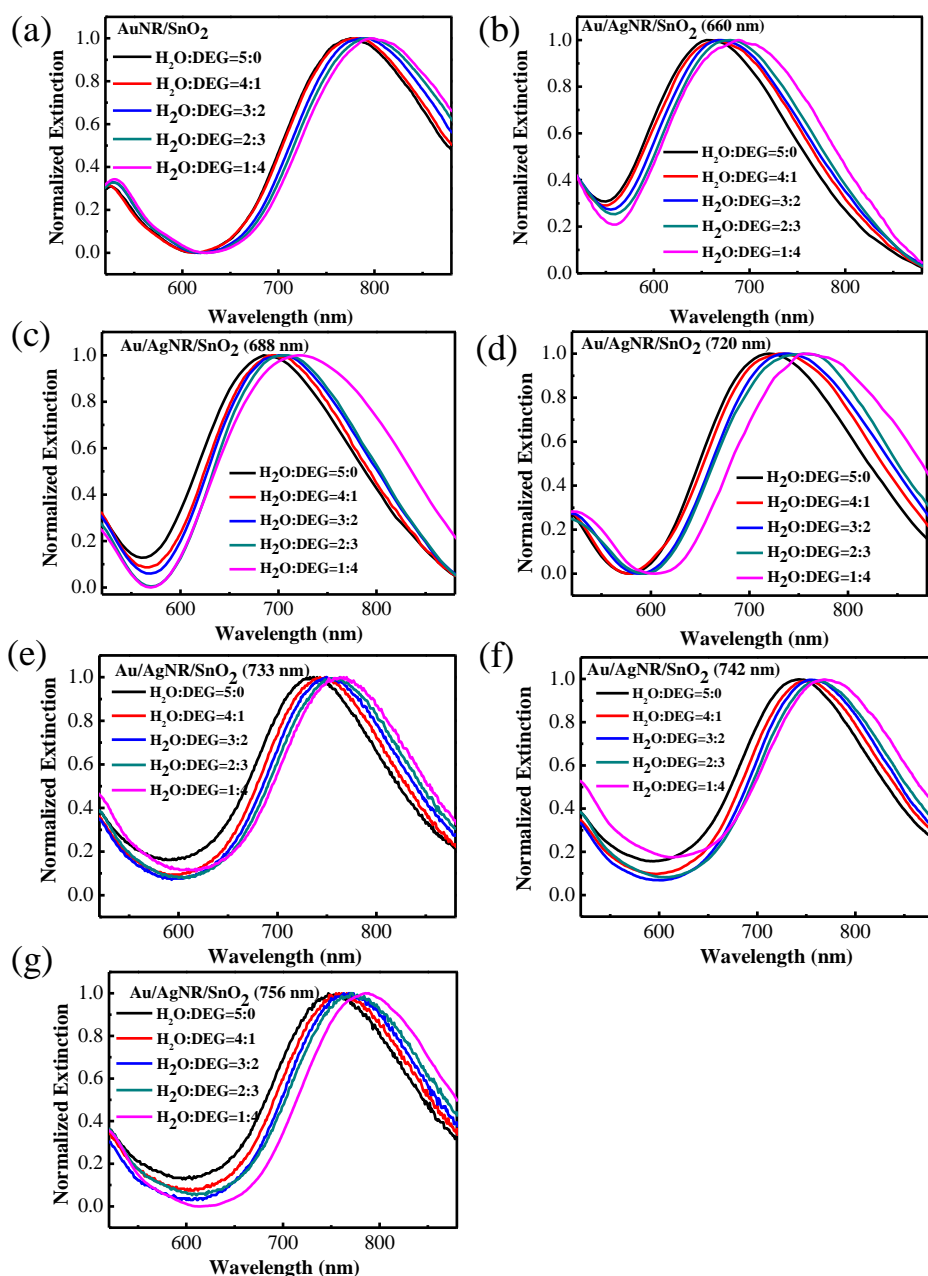

**Figure S7** Normalized extinction spectra of AuNR/SnO<sub>2</sub> (a), Au/AgNR/SnO<sub>2</sub>(660nm) (b), Au/AgNR/SnO<sub>2</sub>(688nm) (c), Au/AgNR/SnO<sub>2</sub>(720nm) (d), Au/AgNR/SnO<sub>2</sub>(733nm) (e), Au/AgNR/SnO<sub>2</sub>(742nm) (f) and Au/AgNR/SnO<sub>2</sub>(756nm) (g) in water-DEG liquid mixture solvent of varying volume ratios.

#### Reference:

1. B. Nikoobakht and M. A. El-Sayed, *Chem. Mater.*, 2003, **15**, 1957-1962.
2. X. Kou, Z.. Sun, Z. Yang, H. Chen and J. Wang, *Langmuir*, 2009, **25**, 1692-1698.
